# Supplementary material for: Depletion of Retinal Dopaminergic Activity in a Mouse Model of Rod Dysfunction Exacerbates Experimental Autoimmune Uveoretinitis: A Role for the Gateway Reflex
Source: Int J Mol Sci. 2021 Dec 31;23(1):453. doi: 10.3390/ijms23010453 (PMC8745287; doi:10.3390/ijms23010453)
Supplement: Supplementary file 1 [file ijms-23-00453-s001.zip › Supplementary Table S1.xlsx]

## Sheet: Table S1
Table S1. All differentially expressed genes (DEGs) in the neuroretina of Gnat1rd17 mice compared to WT mice. DEGs were identified using cutoff values of absolute log2-fold change of 1 and FDR < 0.05.
Rank	Gene ID	Symbol	Definition	Biotype	logFC	Type of deregulation	P value	Adjusted P value
1	ENSMUSG00000027014	Cwc22	CWC22 spliceosome-associated protein	protein coding	4.93	up	0	0
2	ENSMUSG00000100801	Gm15459	predicted gene 15459	processed pseudogene	4.96	up	0	0
3	ENSMUSG00000034837	Gnat1	guanine nucleotide binding protein, alpha transducing 1	protein coding	-4.43	down	0	0
4	ENSMUSG00000037846	Rtkn2	rhotekin 2	protein coding	5.17	up	4.02e-247	2.26e-243
5	ENSMUSG00000036242	Armh4	armadillo-like helical domain containing 4	protein coding	2.67	up	2.22e-109	9.96e-106
6	ENSMUSG00000020014	Cfap54	cilia and flagella associated protein 54	protein coding	2.16	up	1.28e-75	4.78e-72
7	ENSMUSG00000037112	Sik2	salt inducible kinase 2	protein coding	-1.13	down	1.01e-63	3.24e-60
8	ENSMUSG00000042210	Abhd14a	abhydrolase domain containing 14A	protein coding	-3.03	down	1e-55	2.82e-52
9	ENSMUSG00000053420	Gm4792	predicted gene 4792	protein coding	-2.84	down	2.84e-55	7.08e-52
10	ENSMUSG00000025498	Irf7	interferon regulatory factor 7	protein coding	-2.24	down	7.19e-45	1.47e-41
11	ENSMUSG00000088025	Rprl3	ribonuclease P RNA-like 3	ribozyme	7.03	up	7.38e-40	1.27e-36
12	ENSMUSG00000041840	Haus1	HAUS augmin-like complex, subunit 1	protein coding	-2.04	down	2.68e-39	4.29e-36
13	ENSMUSG00000032527	Pccb	propionyl Coenzyme A carboxylase, beta polypeptide	protein coding	1.34	up	3.53e-38	4.95e-35
14	ENSMUSG00000071984	Fndc1	fibronectin type III domain containing 1	protein coding	1.27	up	2.35e-37	3.1e-34
15	ENSMUSG00000062353	Gm15772	predicted gene 15772	processed pseudogene	6.38	up	2.95e-36	3.68e-33
16	ENSMUSG00000027401	Tgm3	transglutaminase 3, E polypeptide	protein coding	4.99	up	8.34e-36	9.85e-33
17	ENSMUSG00000025496	Drd4	dopamine receptor D4	protein coding	-1.16	down	1.06e-35	1.19e-32
18	ENSMUSG00000086421	Gm14091	predicted gene 14091	lncRNA	-2.74	down	6.18e-35	6.61e-32
19	ENSMUSG00000032221	Mns1	meiosis-specific nuclear structural protein 1	protein coding	-3.5	down	4.43e-34	4.52e-31
20	ENSMUSG00000024227	Pdzph1	PDZ and pleckstrin homology domains 1	protein coding	1.07	up	2.43e-33	2.38e-30
21	ENSMUSG00000050211	Pla2g4e	phospholipase A2, group IVE	protein coding	2.62	up	8.28e-31	7.44e-28
22	ENSMUSG00000024421	Lama3	laminin, alpha 3	protein coding	1.92	up	8.99e-28	7.48e-25
23	ENSMUSG00000115756	Gm49519	predicted gene, 49519	lncRNA	-3.34	down	4.77e-27	3.83e-24
24	ENSMUSG00000021846	Peli2	pellino 2	protein coding	-1.07	down	2.54e-26	1.97e-23
25	ENSMUSG00000059058	Tma7-ps	translational machinery associated 7 homolog (S. cerevisiae), pseudogene	processed pseudogene	3.61	up	1.05e-24	7.87e-22
26	ENSMUSG00000083116	Gm13410	predicted gene 13410	processed pseudogene	4.86	up	3.18e-23	2.16e-20
27	ENSMUSG00000083773	Gm13394	predicted gene 13394	processed pseudogene	10.8	up	7.36e-23	4.86e-20
28	ENSMUSG00000032698	Lmo2	LIM domain only 2	protein coding	1.89	up	1.06e-21	6.63e-19
29	ENSMUSG00000115316	Gm49096	predicted gene, 49096	TEC	-4.72	down	6.13e-21	3.62e-18
30	ENSMUSG00000096010	Hist4h4	histone cluster 4, H4	protein coding	1.37	up	3.44e-20	1.98e-17
31	ENSMUSG00000095597	Gm6472	predicted pseudogene 6472	transcribed processed pseudogene	8.74	up	2.01e-19	1.07e-16
32	ENSMUSG00000033871	Ppargc1b	peroxisome proliferative activated receptor, gamma, coactivator 1 beta	protein coding	-1.06	down	7.39e-19	3.86e-16
33	ENSMUSG00000001027	Scn4a	sodium channel, voltage-gated, type IV, alpha	protein coding	-1.33	down	1.19e-18	6.06e-16
34	ENSMUSG00000040093	Bmf	BCL2 modifying factor	protein coding	-1.67	down	5.53e-18	2.64e-15
35	ENSMUSG00000030761	Myo7a	myosin VIIA	protein coding	-1.02	down	1.05e-17	4.93e-15
36	ENSMUSG00000096768	Gm47283	predicted gene, 47283	lncRNA	1.87	up	2.13e-17	9.76e-15
37	ENSMUSG00000064330	Pde6h	phosphodiesterase 6H, cGMP-specific, cone, gamma	protein coding	-1.08	down	1.04e-16	4.41e-14
38	ENSMUSG00000023034	Nr4a1	nuclear receptor subfamily 4, group A, member 1	protein coding	-1.17	down	1.61e-16	6.57e-14
39	ENSMUSG00000113263	Gm4811	predicted gene 4811	processed pseudogene	4.41	up	1.22e-15	4.66e-13
40	ENSMUSG00000043192	Gm1840	predicted gene 1840	processed pseudogene	3.22	up	1.65e-15	6.18e-13
41	ENSMUSG00000023345	Poc1a	POC1 centriolar protein A	protein coding	1.78	up	5.73e-15	2.08e-12
42	ENSMUSG00000002324	Rec8	REC8 meiotic recombination protein	protein coding	-3.7	down	6.09e-15	2.17e-12
43	ENSMUSG00000111685	Gm10686	predicted gene 10686	TEC	-2.84	down	1.21e-14	4.19e-12
44	ENSMUSG00000055323	Gm9967	predicted gene 9967	lncRNA	1.99	up	5.1e-14	1.66e-11
45	ENSMUSG00000020806	Rhbdf2	rhomboid 5 homolog 2	protein coding	-1.64	down	1.86e-13	5.57e-11
46	ENSMUSG00000085666	Gm9855	predicted pseudogene 9855	processed pseudogene	8.1	up	3.21e-13	9.49e-11
47	ENSMUSG00000097431	Gm26782	predicted gene, 26782	lncRNA	-1.3	down	6.42e-13	1.71e-10
48	ENSMUSG00000097211	BC065403	cDNA sequence BC065403	lncRNA	-7.99	down	9.45e-13	2.41e-10
49	ENSMUSG00000101262	Gm8326	predicted gene 8326	processed pseudogene	2.66	up	1.6e-12	4e-10
50	ENSMUSG00000087259	2610035D17Rik	RIKEN cDNA 2610035D17 gene	lncRNA	-1.91	down	2.2e-12	5.44e-10
51	ENSMUSG00000050550	Gm11868	predicted gene 11868	processed pseudogene	5.05	up	2.79e-12	6.66e-10
52	ENSMUSG00000083798	Gm14584	predicted gene 14584	processed pseudogene	3.14	up	5.79e-12	1.33e-09
53	ENSMUSG00000058174	Gm5148	predicted gene 5148	protein coding	-7.75	down	5.97e-12	1.35e-09
54	ENSMUSG00000098021	Gm9522	predicted gene 9522	processed pseudogene	1.67	up	7.96e-12	1.72e-09
55	ENSMUSG00000032251	Irak1bp1	interleukin-1 receptor-associated kinase 1 binding protein 1	protein coding	-1.47	down	1.68e-11	3.47e-09
56	ENSMUSG00000032572	Col6a4	collagen, type VI, alpha 4	protein coding	-3.05	down	1.87e-11	3.82e-09
57	ENSMUSG00000078480	Mrpl48-ps	mitochondrial ribosomal protein L48 pseudogene	processed pseudogene	4.88	up	2.22e-11	4.45e-09
58	ENSMUSG00000098959	Gm27230	predicted gene 27230	lncRNA	-7.57	down	2.37e-11	4.71e-09
59	ENSMUSG00000040428	Plekha4	pleckstrin homology domain containing, family A (phosphoinositide binding specific) member 4	protein coding	1.64	up	6.97e-11	1.31e-08
60	ENSMUSG00000113332	Gm9259	predicted gene 9259	unprocessed pseudogene	7.33	up	1.02e-10	1.9e-08
61	ENSMUSG00000109101	Gm45132	predicted gene 45132	TEC	1.4	up	1.17e-10	2.16e-08
62	ENSMUSG00000082935	Gm7658	predicted gene 7658	processed pseudogene	3.82	up	1.4e-10	2.54e-08
63	ENSMUSG00000045464	2810002D19Rik	RIKEN cDNA 2810002D19 gene	lncRNA	-1.33	down	2.06e-10	3.64e-08
64	ENSMUSG00000084401	Gm12586	predicted gene 12586	unprocessed pseudogene	7.28	up	2.44e-10	4.25e-08
65	ENSMUSG00000019718	L3hypdh	L-3-hydroxyproline dehydratase (trans-)	protein coding	1.03	up	2.49e-10	4.29e-08
66	ENSMUSG00000027298	Tyro3	TYRO3 protein tyrosine kinase 3	protein coding	-1.21	down	3.33e-10	5.71e-08
67	ENSMUSG00000102925	Gm37150	predicted gene, 37150	TEC	-7.19	down	3.49e-10	5.94e-08
68	ENSMUSG00000030470	Csrp3	cysteine and glycine-rich protein 3	protein coding	2.06	up	3.56e-10	6.01e-08
69	ENSMUSG00000067608	Pcna-ps2	proliferating cell nuclear antigen pseudogene 2	processed pseudogene	5.4	up	4.69e-10	7.8e-08
70	ENSMUSG00000066553	Gm6969	predicted pseudogene 6969	processed pseudogene	7.18	up	4.77e-10	7.82e-08
71	ENSMUSG00000097574	C920006O11Rik	RIKEN cDNA C920006O11 gene	transcribed unprocessed pseudogene	-2.39	down	8.84e-10	1.42e-07
72	ENSMUSG00000027380	Acoxl	acyl-Coenzyme A oxidase-like	protein coding	-4.59	down	1.09e-09	1.73e-07
73	ENSMUSG00000021596	Mctp1	multiple C2 domains, transmembrane 1	protein coding	1.42	up	1.21e-09	1.92e-07
74	ENSMUSG00000107470	Gm3375	predicted gene 3375	processed pseudogene	6.76	up	1.5e-09	2.35e-07
75	ENSMUSG00000043424	Eif3j2	eukaryotic translation initiation factor 3, subunit J2	protein coding	2.79	up	2.93e-09	4.38e-07
76	ENSMUSG00000079355	Ackr4	atypical chemokine receptor 4	protein coding	2.18	up	3.38e-09	4.99e-07
77	ENSMUSG00000030230	Plcz1	phospholipase C, zeta 1	protein coding	1.6	up	4.08e-09	5.98e-07
78	ENSMUSG00000075224	Lrrc55	leucine rich repeat containing 55	protein coding	1.12	up	4.58e-09	6.64e-07
79	ENSMUSG00000063171	Rps4l	ribosomal protein S4-like	transcribed processed pseudogene	-1.01	down	5.28e-09	7.59e-07
80	ENSMUSG00000118467	BX001068.1	zinc finger and SCAN domain containing 31 (ZSCAN31) pseudogene	unitary pseudogene	-1.95	down	5.62e-09	8.04e-07
81	ENSMUSG00000091408	Gm6728	predicted gene 6728	processed pseudogene	6.83	up	6.07e-09	8.62e-07
82	ENSMUSG00000101279	Gm18342	predicted gene, 18342	unprocessed pseudogene	2.87	up	1.26e-08	1.73e-06
83	ENSMUSG00000035394	Cfap53	cilia and flagella associated protein 53	protein coding	-1.39	down	1.46e-08	1.96e-06
84	ENSMUSG00000030838	Ush1c	USH1 protein network component harmonin	protein coding	3.33	up	1.86e-08	2.48e-06
85	ENSMUSG00000108207	1810059H22Rik	RIKEN cDNA 1810059H22 gene	lncRNA	-1.3	down	1.88e-08	2.5e-06
86	ENSMUSG00000054206	Gzmm	granzyme M (lymphocyte met-ase 1)	protein coding	-1.02	down	2.71e-08	3.52e-06
87	ENSMUSG00000038670	Mybpc2	myosin binding protein C, fast-type	protein coding	-2.39	down	3.06e-08	3.93e-06
88	ENSMUSG00000091900	Gm4353	predicted gene 4353	processed pseudogene	3.97	up	3.11e-08	3.97e-06
89	ENSMUSG00000110170	St6galnac2	ST6 (alpha-N-acetyl-neuraminyl-2,3-beta-galactosyl-1,3)-N-acetylgalactosaminide alpha-2,6-sialyltransferase 2	protein coding	-2.13	down	3.92e-08	4.92e-06
90	ENSMUSG00000101963	1700001J11Rik	RIKEN cDNA 1700001J11 gene	transcribed processed pseudogene	6.4	up	4.22e-08	5.26e-06
91	ENSMUSG00000115725	4930572G02Rik	RIKEN cDNA 4930572G02 gene	lncRNA	-3.27	down	4.39e-08	5.41e-06
92	ENSMUSG00000103847	Gm20056	predicted gene, 20056	processed pseudogene	5.55	up	5e-08	6.11e-06
93	ENSMUSG00000027750	Postn	periostin, osteoblast specific factor	protein coding	1.27	up	8.02e-08	9.38e-06
94	ENSMUSG00000081683	Fzd10	frizzled class receptor 10	protein coding	-1.22	down	8.42e-08	9.77e-06
95	ENSMUSG00000024437	Gm8615	predicted pseudogene 8615	transcribed processed pseudogene	2.54	up	1.8e-07	2.05e-05
96	ENSMUSG00000058126	Tpm3-rs7	tropomyosin 3, related sequence 7	protein coding	3.3	up	1.95e-07	2.19e-05
97	ENSMUSG00000027699	Ect2	ect2 oncogene	protein coding	1.38	up	2.24e-07	2.45e-05
98	ENSMUSG00000089789	Rdh1	retinol dehydrogenase 1 (all trans)	protein coding	2.33	up	2.67e-07	2.86e-05
99	ENSMUSG00000072476	Gm9008	predicted pseudogene 9008	protein coding	5.82	up	3e-07	3.18e-05
100	ENSMUSG00000090389	Cdv3-ps	Cdv3 retrotransposed pseudogene	processed pseudogene	5.82	up	3.09e-07	3.26e-05
101	ENSMUSG00000115228	Gm48948	predicted gene, 48948	TEC	4.64	up	3.3e-07	3.46e-05
102	ENSMUSG00000084390	Gm15425	predicted gene 15425	processed pseudogene	-1.68	down	5.5e-07	5.57e-05
103	ENSMUSG00000027326	Knl1	kinetochore scaffold 1	protein coding	-1.79	down	5.98e-07	6.02e-05
104	ENSMUSG00000111512	Gm17853	predicted gene, 17853	processed pseudogene	-5.84	down	8.73e-07	8.45e-05
105	ENSMUSG00000117842	Gm41793	predicted gene, 41793	lncRNA	1.31	up	1.01e-06	9.61e-05
106	ENSMUSG00000021590	Spata9	spermatogenesis associated 9	protein coding	1.76	up	1.15e-06	0.000108
107	ENSMUSG00000115212	Gm8417	predicted gene 8417	transcribed unprocessed pseudogene	4.38	up	1.36e-06	0.000126
108	ENSMUSG00000115742	Gm48950	predicted gene, 48950	TEC	4.93	up	1.91e-06	0.000173
109	ENSMUSG00000073158	9030624G23Rik	RIKEN cDNA 9030624G23 gene	protein coding	1.06	up	1.94e-06	0.000174
110	ENSMUSG00000087353	Gm13727	predicted gene 13727	lncRNA	5.57	up	2.14e-06	0.00019
111	ENSMUSG00000113047	Gm47469	predicted gene, 47469	lncRNA	1.77	up	2.46e-06	0.000215
112	ENSMUSG00000055452	Gm7353	predicted pseudogene 7353	processed pseudogene	5.29	up	2.53e-06	0.00022
113	ENSMUSG00000113199	Gm9229	predicted gene 9229	unprocessed pseudogene	5.53	up	2.73e-06	0.000236
114	ENSMUSG00000045730	Adrb2	adrenergic receptor, beta 2	protein coding	-3.47	down	3.2e-06	0.000272
115	ENSMUSG00000117465	Gm49980	predicted gene, 49980	lncRNA	2.65	up	3.45e-06	0.000291
116	ENSMUSG00000112640	Gm32687	predicted gene, 32687	protein coding	-5.4	down	3.72e-06	0.000311
117	ENSMUSG00000072844	G530011O06Rik	RIKEN cDNA G530011O06 gene	lncRNA	-2.08	down	6.19e-06	0.000497
118	ENSMUSG00000004415	Col26a1	collagen, type XXVI, alpha 1	protein coding	-1.91	down	6.67e-06	0.000531
119	ENSMUSG00000108472	Gm45212	predicted gene 45212	TEC	-1.22	down	8.58e-06	0.000656
120	ENSMUSG00000083554	Gm6645	predicted gene 6645	processed pseudogene	3.18	up	9.48e-06	0.000719
121	ENSMUSG00000000958	Slc7a7	solute carrier family 7 (cationic amino acid transporter, y+ system), member 7	protein coding	-1.34	down	1.01e-05	0.000761
122	ENSMUSG00000096001	2610528A11Rik	RIKEN cDNA 2610528A11 gene	protein coding	-1.47	down	1.05e-05	0.000782
123	ENSMUSG00000113857	Gm46338	predicted gene, 46338	unprocessed pseudogene	4.88	up	1.06e-05	0.000789
124	ENSMUSG00000072572	Slc39a2	solute carrier family 39 (zinc transporter), member 2	protein coding	-1.16	down	1.21e-05	0.000879
125	ENSMUSG00000034427	Myo15b	myosin XVB	protein coding	-1.63	down	1.44e-05	0.00104
126	ENSMUSG00000103445	Gm36948	predicted gene, 36948	TEC	-2.85	down	1.51e-05	0.00108
127	ENSMUSG00000113724	Gm48398	predicted gene, 48398	processed pseudogene	-4.4	down	2.2e-05	0.00151
128	ENSMUSG00000111761	9230112J17Rik	RIKEN cDNA 9230112J17 gene	lncRNA	-3.04	down	2.2e-05	0.00151
129	ENSMUSG00000102461	Gm37166	predicted gene, 37166	TEC	-1.61	down	2.48e-05	0.00167
130	ENSMUSG00000114442	F630042J09Rik	RIKEN cDNA F630042J09 gene	lncRNA	2.17	up	2.65e-05	0.00178
131	ENSMUSG00000117451	Gm49982	predicted gene, 49982	processed pseudogene	4.2	up	2.76e-05	0.00183
132	ENSMUSG00000116926	Gm18234	predicted gene, 18234	processed pseudogene	3.95	up	3.07e-05	0.00201
133	ENSMUSG00000095562	Gm21887	predicted gene, 21887	lncRNA	1.35	up	3.12e-05	0.00204
134	ENSMUSG00000085008	Dbhos	dopamine beta hydroxylase, opposite strand	lncRNA	-1.05	down	3.27e-05	0.0021
135	ENSMUSG00000108608	Gm6916	predicted pseudogene 6916	transcribed processed pseudogene	3	up	3.43e-05	0.0022
136	ENSMUSG00000115787	Gm36146	predicted gene, 36146	lncRNA	3.23	up	3.55e-05	0.00227
137	ENSMUSG00000086838	Gm16212	predicted gene 16212	lncRNA	3.6	up	4.52e-05	0.0028
138	ENSMUSG00000020062	Slc5a8	solute carrier family 5 (iodide transporter), member 8	protein coding	-3.38	down	5.38e-05	0.00324
139	ENSMUSG00000020325	Fstl3	follistatin-like 3	protein coding	-1.22	down	6.62e-05	0.00389
140	ENSMUSG00000098488	Pla2g4b	phospholipase A2, group IVB (cytosolic)	protein coding	-1.68	down	7.02e-05	0.00408
141	ENSMUSG00000113411	Gm48643	predicted gene, 48643	processed pseudogene	3.27	up	7.18e-05	0.00417
142	ENSMUSG00000098789	Jmjd7	jumonji domain containing 7	protein coding	-2.4	down	7.44e-05	0.00428
143	ENSMUSG00000082791	Gm4875	predicted gene 4875	processed pseudogene	1.62	up	7.48e-05	0.00429
144	ENSMUSG00000097891	Gm3650	predicted gene 3650	unprocessed pseudogene	2.99	up	9.22e-05	0.00517
145	ENSMUSG00000040170	Fmo2	flavin containing monooxygenase 2	protein coding	1.68	up	0.000113	0.00615
146	ENSMUSG00000043719	Col6a6	collagen, type VI, alpha 6	protein coding	-1.38	down	0.000128	0.00687
147	ENSMUSG00000044083	Efcab8	EF-hand calcium binding domain 8	protein coding	1.53	up	0.000136	0.00723
148	ENSMUSG00000086188	Gm15169	predicted gene 15169	lncRNA	-2.57	down	0.000137	0.00729
149	ENSMUSG00000091020	Gm5828	predicted gene 5828	processed pseudogene	2.09	up	0.000144	0.0075
150	ENSMUSG00000115345	Gm33497	predicted gene, 33497	lncRNA	1.08	up	0.000161	0.00825
151	ENSMUSG00000050174	Nudt6	nudix (nucleoside diphosphate linked moiety X)-type motif 6	protein coding	-1.3	down	0.000163	0.00827
152	ENSMUSG00000045104	Gm5514	predicted gene 5514	processed pseudogene	2.27	up	0.00018	0.00899
153	ENSMUSG00000021280	Exoc3l4	exocyst complex component 3-like 4	protein coding	-1.76	down	0.000187	0.00927
154	ENSMUSG00000113439	Gm49382	predicted gene, 49382	processed pseudogene	2.08	up	0.000215	0.0105
155	ENSMUSG00000078183	Gm15610	predicted gene 15610	processed pseudogene	2.01	up	0.000233	0.0111
156	ENSMUSG00000104287	Gm37456	predicted gene, 37456	TEC	-1.92	down	0.000253	0.0119
157	ENSMUSG00000115598	Gm9290	predicted gene 9290	processed pseudogene	1.59	up	0.000264	0.0123
158	ENSMUSG00000105703	Gm43305	predicted gene 43305	lncRNA	-1.73	down	0.00029	0.0133
159	ENSMUSG00000068762	Gstm6	glutathione S-transferase, mu 6	protein coding	-1.25	down	0.000292	0.0133
160	ENSMUSG00000113569	Gm48035	predicted gene, 48035	processed pseudogene	1.77	up	0.000293	0.0133
161	ENSMUSG00000115280	Gm7107	predicted gene 7107	processed pseudogene	1.1	up	0.000362	0.0161
162	ENSMUSG00000107698	Gm44430	predicted gene, 44430	TEC	-1.04	down	0.000384	0.017
163	ENSMUSG00000083623	Gm7224	predicted gene 7224	unprocessed pseudogene	1.27	up	0.000414	0.018
164	ENSMUSG00000071470	Ccnb1ip1	cyclin B1 interacting protein 1	protein coding	1.35	up	0.000473	0.0202
165	ENSMUSG00000085783	Gm9816	predicted pseudogene 9816	processed pseudogene	1.04	up	0.000489	0.0207
166	ENSMUSG00000114158	Gm49372	predicted gene, 49372	processed pseudogene	1.22	up	0.000561	0.023
