# Supplementary material for: Depletion of Retinal Dopaminergic Activity in a Mouse Model of Rod Dysfunction Exacerbates Experimental Autoimmune Uveoretinitis: A Role for the Gateway Reflex
Source: Int J Mol Sci. 2021 Dec 31;23(1):453. doi: 10.3390/ijms23010453 (PMC8745287; doi:10.3390/ijms23010453)
Supplement: Supplementary file 1 [file ijms-23-00453-s001.zip › Supplementary Table S2.xlsx]

## Sheet: Table S2
Table S2. GO analysis for biological process. All statistically significant biological process GO terms for protein-coding genes that are differentially expressed in the neuroretinas of Gnat1rd17 mice compared to WT mice as found by MGI Gene Ontology Term Finder [113].
GO ID	GO term	P value
GO:0009987	cellular process	1.05981e-05
GO:0022607	cellular component assembly	0.00010336
GO:0007155	cell adhesion	0.000155034
GO:0022610	biological adhesion	0.000164046
GO:0044085	cellular component biogenesis	0.000279858
GO:0032502	developmental process	0.00031919
GO:0071844	cellular component assembly at cellular level	0.000425434
GO:0006814	sodium ion transport	0.000571037
GO:0045637	regulation of myeloid cell differentiation	0.000688227
GO:0007275	multicellular organismal development	0.000743825
GO:0045638	negative regulation of myeloid cell differentiation	0.000797887
GO:0009966	regulation of signal transduction	0.000892793
GO:0030155	regulation of cell adhesion	0.000986883
GO:0032504	multicellular organism reproduction	0.00108726
GO:0048609	multicellular organismal reproductive process	0.00108726
GO:0048869	cellular developmental process	0.00110358
GO:0032501	multicellular organismal process	0.00124676
GO:0002026	regulation of the force of heart contraction	0.00165663
GO:0033238	regulation of cellular amine metabolic process	0.00165663
GO:0030154	cell differentiation	0.00177608
GO:0051345	positive regulation of hydrolase activity	0.00182657
GO:0007243	intracellular protein kinase cascade	0.00187745
GO:0023014	signal transduction via phosphorylation event	0.00189976
GO:0016043	cellular component organization	0.00210861
GO:0016042	lipid catabolic process	0.00214603
GO:0009395	phospholipid catabolic process	0.00258247
GO:0071840	cellular component organization or biogenesis	0.00310995
GO:0030001	metal ion transport	0.00316016
GO:0043085	positive regulation of catalytic activity	0.00318074
GO:0044093	positive regulation of molecular function	0.00326082
GO:0007188	G-protein signaling, coupled to cAMP nucleotide second messenger	0.00330367
GO:0023051	regulation of signaling	0.0037432
GO:0007129	synapsis	0.00387609
GO:0051259	protein oligomerization	0.00412535
GO:0007187	G-protein signaling, coupled to cyclic nucleotide second messenger	0.00417292
GO:0022414	reproductive process	0.00433748
GO:0034121	regulation of toll-like receptor signaling pathway	0.00442429
GO:0000003	reproduction	0.00446742
GO:0050709	negative regulation of protein secretion	0.00461453
GO:0048856	anatomical structure development	0.00500111
GO:0045944	positive regulation of transcription from RNA polymerase II promoter	0.00505293
GO:0044242	cellular lipid catabolic process	0.00508108
GO:0003341	cilium movement	0.00520759
GO:0009653	anatomical structure morphogenesis	0.00522026
GO:0007601	visual perception	0.00534778
GO:0071842	cellular component organization at cellular level	0.00538582
GO:0050953	sensory perception of light stimulus	0.00543852
GO:0048522	positive regulation of cellular process	0.00545229
GO:0019933	cAMP-mediated signaling	0.00553018
GO:0002028	regulation of sodium ion transport	0.00562138
GO:0035556	intracellular signal transduction	0.0057508
GO:0042058	regulation of epidermal growth factor receptor signaling pathway	0.00583376
GO:0070527	platelet aggregation	0.00583376
GO:0030099	myeloid cell differentiation	0.00590268
GO:0043406	positive regulation of MAP kinase activity	0.00600242
GO:0006812	cation transport	0.00603453
GO:0006811	ion transport	0.00638562
GO:0045670	regulation of osteoclast differentiation	0.00671943
GO:0070192	chromosome organization involved in meiosis	0.0069498
GO:0048518	positive regulation of biological process	0.00699674
GO:0030097	hemopoiesis	0.00715012
GO:0051336	regulation of hydrolase activity	0.00719255
GO:0043065	positive regulation of apoptosis	0.00728375
GO:0019935	cyclic-nucleotide-mediated signaling	0.00734073
GO:0043068	positive regulation of programmed cell death	0.00744387
GO:0044238	primary metabolic process	0.00759209
GO:0048646	anatomical structure formation involved in morphogenesis	0.00762122
GO:0071456	cellular response to hypoxia	0.00766218
GO:0071841	cellular component organization or biogenesis at cellular level	0.00792951
GO:0015672	monovalent inorganic cation transport	0.00801597
GO:0045453	bone resorption	0.00815464
GO:0060079	regulation of excitatory postsynaptic membrane potential	0.00815464
GO:0008152	metabolic process	0.00823293
GO:0045860	positive regulation of protein kinase activity	0.00879115
GO:0010942	positive regulation of cell death	0.00912059
GO:0071453	cellular response to oxygen levels	0.00944629
GO:0048534	hemopoietic or lymphoid organ development	0.00950404
GO:0042325	regulation of phosphorylation	0.00963899
GO:0070887	cellular response to chemical stimulus	0.0100205
GO:0060078	regulation of postsynaptic membrane potential	0.0102621
GO:0051321	meiotic cell cycle	0.0103771
GO:0016310	phosphorylation	0.0107304
GO:0048583	regulation of response to stimulus	0.0112101
GO:0033674	positive regulation of kinase activity	0.0115014
GO:0016337	cell-cell adhesion	0.0118861
GO:0006468	protein phosphorylation	0.0120962
GO:0000165	MAPKKK cascade	0.0121382
GO:0002520	immune system development	0.0122432
GO:0030316	osteoclast differentiation	0.012584
GO:0034109	homotypic cell-cell adhesion	0.012584
GO:0010927	cellular component assembly involved in morphogenesis	0.01265
GO:0007165	signal transduction	0.0137324
GO:0051223	regulation of protein transport	0.0139335
GO:0002224	toll-like receptor signaling pathway	0.0141406
GO:0034614	cellular response to reactive oxygen species	0.0144614
GO:0071902	positive regulation of protein serine/threonine kinase activity	0.0145274
GO:0007127	meiosis I	0.0147854
GO:0046849	bone remodeling	0.0147854
GO:0051347	positive regulation of transferase activity	0.0149236
GO:0030811	regulation of nucleotide catabolic process	0.0150201
GO:0033121	regulation of purine nucleotide catabolic process	0.0150201
GO:0043405	regulation of MAP kinase activity	0.0150201
GO:0007173	epidermal growth factor receptor signaling pathway	0.0151125
GO:0030168	platelet activation	0.0151125
GO:0019220	regulation of phosphate metabolic process	0.015185
GO:0051174	regulation of phosphorus metabolic process	0.0153101
GO:0008277	regulation of G-protein coupled receptor protein signaling pathway	0.0154427
GO:0006140	regulation of nucleotide metabolic process	0.0154924
GO:0051716	cellular response to stimulus	0.0156502
GO:0006936	muscle contraction	0.0156917
GO:0002221	pattern recognition receptor signaling pathway	0.0161124
GO:0008306	associative learning	0.0164519
GO:0002758	innate immune response-activating signal transduction	0.0171399
GO:0050794	regulation of cellular process	0.0173176
GO:0031399	regulation of protein modification process	0.0175517
GO:0051179	localization	0.0178379
GO:0023052	signaling	0.0179112
GO:0045893	positive regulation of transcription, DNA-dependent	0.0183244
GO:0006753	nucleoside phosphate metabolic process	0.0185329
GO:0009117	nucleotide metabolic process	0.0185329
GO:0031589	cell-substrate adhesion	0.0185457
GO:0050790	regulation of catalytic activity	0.0187188
GO:0070201	regulation of establishment of protein localization	0.0191933
GO:0000187	activation of MAPK activity	0.0196427
GO:0002218	activation of innate immune response	0.0200121
GO:0019748	secondary metabolic process	0.0200121
GO:0048641	regulation of skeletal muscle tissue development	0.0200121
GO:0006464	protein modification process	0.0201667
GO:0006195	purine nucleotide catabolic process	0.0202696
GO:0060249	anatomical structure homeostasis	0.0214665
GO:0003073	regulation of systemic arterial blood pressure	0.0215185
GO:0002761	regulation of myeloid leukocyte differentiation	0.0219023
GO:0022407	regulation of cell-cell adhesion	0.0219023
GO:0050728	negative regulation of inflammatory response	0.0222889
GO:0001932	regulation of protein phosphorylation	0.0223808
GO:0007010	cytoskeleton organization	0.0225708
GO:0072523	purine-containing compound catabolic process	0.0227014
GO:0051254	positive regulation of RNA metabolic process	0.0228005
GO:0006796	phosphate metabolic process	0.024713
GO:0006793	phosphorus metabolic process	0.0247841
GO:0007049	cell cycle	0.0250353
GO:0051899	membrane depolarization	0.0254826
GO:0009166	nucleotide catabolic process	0.0255078
GO:0051093	negative regulation of developmental process	0.0255838
GO:0055086	nucleobase, nucleoside and nucleotide metabolic process	0.0255838
GO:0065009	regulation of molecular function	0.0257963
GO:0006461	protein complex assembly	0.0279005
GO:0070271	protein complex biogenesis	0.0279005
GO:0043412	macromolecule modification	0.0279429
GO:0048513	organ development	0.0281936
GO:0044237	cellular metabolic process	0.0284337
GO:0030036	actin cytoskeleton organization	0.0284639
GO:0030031	cell projection assembly	0.0292071
GO:0048731	system development	0.0292525
GO:0006941	striated muscle contraction	0.0292836
GO:0034655	nucleobase, nucleoside, nucleotide and nucleic acid catabolic process	0.0296885
GO:0034656	nucleobase, nucleoside and nucleotide catabolic process	0.0296885
GO:0044255	cellular lipid metabolic process	0.0298839
GO:2000026	regulation of multicellular organismal development	0.0298996
GO:0051224	negative regulation of protein transport	0.0301572
GO:0000302	response to reactive oxygen species	0.0310412
GO:0007162	negative regulation of cell adhesion	0.031487
GO:0034329	cell junction assembly	0.031487
GO:0003012	muscle system process	0.0316561
GO:0002682	regulation of immune system process	0.0319245
GO:0042592	homeostatic process	0.0321041
GO:0043547	positive regulation of GTPase activity	0.0323862
GO:0032989	cellular component morphogenesis	0.0324074
GO:0030029	actin filament-based process	0.0324776
GO:0032880	regulation of protein localization	0.0332079
GO:0044270	cellular nitrogen compound catabolic process	0.0336908
GO:0046700	heterocycle catabolic process	0.0336908
GO:0042384	cilium assembly	0.0337539
GO:0008016	regulation of heart contraction	0.0342148
GO:0045761	regulation of adenylate cyclase activity	0.0356122
GO:0071822	protein complex subunit organization	0.0356631
GO:0006629	lipid metabolic process	0.0357924
GO:0010557	positive regulation of macromolecule biosynthetic process	0.035825
GO:0042221	response to chemical stimulus	0.0361305
GO:0010628	positive regulation of gene expression	0.0367392
GO:0006163	purine nucleotide metabolic process	0.0368084
GO:0010810	regulation of cell-substrate adhesion	0.0370314
GO:0045089	positive regulation of innate immune response	0.0370314
GO:0031348	negative regulation of defense response	0.0375093
GO:0034599	cellular response to oxidative stress	0.0375093
GO:0044282	small molecule catabolic process	0.0377921
GO:0051262	protein tetramerization	0.0379896
GO:0045859	regulation of protein kinase activity	0.0379907
GO:0007017	microtubule-based process	0.0381898
GO:0051291	protein heterooligomerization	0.0384722
GO:0045935	positive regulation of nucleobase, nucleoside, nucleotide and nucleic acid metabolic process	0.0386139
GO:0055085	transmembrane transport	0.0388205
GO:0031279	regulation of cyclase activity	0.0394445
GO:0051339	regulation of lyase activity	0.0394445
GO:0007612	learning	0.0399342
GO:0071900	regulation of protein serine/threonine kinase activity	0.0407627
GO:0007270	nerve-nerve synaptic transmission	0.0409205
GO:0070838	divalent metal ion transport	0.0410486
GO:0050789	regulation of biological process	0.0416694
GO:0072511	divalent inorganic cation transport	0.0419124
GO:0051173	positive regulation of nitrogen compound metabolic process	0.0424246
GO:0046483	heterocycle metabolic process	0.0431524
GO:0032846	positive regulation of homeostatic process	0.0434262
GO:0031325	positive regulation of cellular metabolic process	0.0434324
GO:0019932	second-messenger-mediated signaling	0.0436676
GO:0045596	negative regulation of cell differentiation	0.0437957
GO:0010604	positive regulation of macromolecule metabolic process	0.0444978
GO:0065007	biological regulation	0.0458188
GO:0001666	response to hypoxia	0.0465067
GO:0030030	cell projection organization	0.0468308
GO:0034330	cell junction organization	0.0470278
GO:0048771	tissue remodeling	0.0470278
GO:0001503	ossification	0.0472871
GO:0007154	cell communication	0.0484143
GO:0001894	tissue homeostasis	0.0491335
GO:0034762	regulation of transmembrane transport	0.0491509
